# Supplementary material for: Sho-saiko-to, a traditional herbal medicine, regulates gene expression and biological function by way of microRNAs in primary mouse hepatocytes
Source: PubMed Central journal article supplement (PMC3893506; doi:10.1186/1472-6882-14-14), 2014-01-11
Supplement: 1472-6882-14-14-S1.pdf [file 1472-6882-14-14-S1.pdf]

# Sho-saiko-to, a traditional herbal medicine, regulates gene expression and biological function by way of microRNAs in primary mouse hepatocytes

Kwang Hoon Song, Yun Hee Kim, Bu-Yeo Kim

**Table S1. Constituents of sho-saiko-to (SST)**

| Components of the herbal medicine    | Proportions (g) |
|--------------------------------------|-----------------|
| <i>Bupleuri Radix</i>                | 11.25           |
| <i>Glycyrrhizae Radix et Rhizoma</i> | 1.875           |
| <i>Ginseng Radix</i>                 | 3.75            |
| <i>Pinellia Tuber</i>                | 3.75            |
| <i>Scutellaria Radix</i>             | 7.5             |
| <i>Zingiberis Rhizome</i>            | 3.75            |
| <i>Zizyphus Fructus</i>              | 3.75            |

**Table S2. List of genes in temporal patterns**

<Temporal up-pattern>

| Symbol        | Entrez | 1hr     | 6hrs   | 24hrs | Symbol        | Entrez | 1hr    | 6hrs   | 24hrs |
|---------------|--------|---------|--------|-------|---------------|--------|--------|--------|-------|
| 1600014C10Rik | 72244  | -0.356* | -0.11  | 1.123 | Ifnk          | 387510 | -0.248 | 1.052  | 1.12  |
| 1700011H14Rik | 67082  | -0.352  | -0.317 | 1.852 | Igdcc4        | 56741  | -0.036 | -0.197 | 1.426 |
| 1700029I01Rik | 70005  | 0.156   | 0.834  | 1.018 | Igf2bp1       | 140486 | -0.057 | -0.056 | 1.772 |
| 1700094C09Rik | 78634  | -1.078  | 0.177  | 1.329 | Igf2bp3       | 140488 | -0.573 | 0.238  | 1.135 |
| 1810064F22Rik | 69862  | -0.66   | 0.904  | 2.858 | Igfbp7        | 29817  | -0.066 | 0.044  | 1.649 |
| 2610002D18Rik | 69885  | -0.332  | -0.141 | 1.16  | Ikbke         | 56489  | -0.277 | 1.043  | 0.727 |
| 2610528A11Rik | 70045  | -0.587  | -0.233 | 1.252 | Il13ra2       | 16165  | 0.342  | 0.31   | 1.439 |
| 2700099C18Rik | 77022  | 0.03    | 0.603  | 1.699 | Il1b          | 16176  | 1.575  | 3.655  | 3.964 |
| 2810442I21Rik | 72735  | -0.045  | 0.218  | 1.015 | Il1f6         | 54448  | -0.159 | 3.563  | 2.618 |
| 2900062L11Rik | 76976  | 0.115   | 1.224  | 0.935 | Il1r1         | 16177  | -0.176 | 0.906  | 1.222 |
| 3110049J23Rik | 67307  | -0.009  | 0.044  | 1.167 | Il33          | 77125  | -0.033 | 0.804  | 1.342 |
| 4833411C07Rik | 71624  | -0.728  | -0.278 | 1.863 | Il5ra         | 16192  | 0.217  | 0.029  | 1.142 |
| 4930427A07Rik | 104732 | 0.025   | 0.032  | 1.052 | Incenp        | 16319  | 0.095  | 0.538  | 1.155 |
| 4930432F04Rik | 78792  | 0.091   | 0.892  | 1.301 | Iqgap3        | 404710 | 0.129  | 0.187  | 1.56  |
| 4930486L24Rik | 214639 | 0.113   | 0.148  | 1.228 | Irak3         | 73914  | -0.084 | 1.41   | 1.456 |
| 4930547N16Rik | 75317  | -0.005  | 0.379  | 1.437 | Itrip         | 414801 | 0.391  | 0.314  | 1.347 |
| 4933437F05Rik | 71275  | -0.517  | -0.05  | 1.317 | Ivl           | 16447  | 0.049  | 0.357  | 1.538 |
| 5730590G19Rik | 77011  | -0.267  | 0.459  | 1.188 | Jam3          | 83964  | -0.812 | -0.011 | 1.192 |
| 6030419C18Rik | 319477 | -0.178  | 0.78   | 1.377 | K230010J24Rik | 432964 | 0.166  | 0.352  | 1.14  |
| 8430408G22Rik | 213393 | -0.456  | 1.143  | 2.044 | Kcnc1         | 16502  | 0.143  | 0.008  | 1.153 |
| 9930023K05Rik | 226245 | 0.19    | 1.467  | 1.204 | Kcnj13        | 1E+08  | 0.4    | 1.008  | 1.325 |
| A330021E22Rik | 207686 | 0.033   | 0.799  | 1.504 | Kcnu1         | 16532  | 0.183  | 0.316  | 1.312 |
| A430105I19Rik | 214239 | 0.256   | 0.498  | 1.093 | Kif15         | 209737 | 0.671  | 0.305  | 1.59  |
| A530016L24Rik | 319942 | 0.232   | -0.082 | 2.145 | Kif18a        | 228421 | 0.01   | 0.33   | 1.089 |
| A630038E17Rik | 219065 | 0.136   | 0.333  | 2.324 | Kif18b        | 70218  | -0.479 | -0.056 | 1.339 |
| AA415398      | 433752 | 0.16    | 0.435  | 1.111 | Kif20a        | 19348  | -0.179 | 0.705  | 1.73  |
| Abcc1         | 17250  | -0.021  | 1.535  | 1.371 | Kif23         | 71819  | -0.151 | 0.655  | 1.782 |
| Abcc4         | 239273 | 0.067   | 0.66   | 2.023 | Kif2c         | 73804  | -0.487 | 0.48   | 1.742 |
| Accn5         | 58170  | 0.009   | 0.635  | 1.214 | Kif4          | 16571  | -0.028 | 0.373  | 1.55  |
| Adam15        | 11490  | -0.103  | -0.08  | 1.017 | Kifc2         | 16581  | 0.077  | 0.544  | 1.288 |
| Adm           | 11535  | -0.104  | 1.468  | 1.194 | Kit           | 16590  | -0.517 | 0.502  | 1.089 |
| Afp           | 11576  | 0.023   | 0.002  | 2.008 | Klf15         | 66277  | 0.064  | 0.493  | 1.019 |
| Agpat4        | 68262  | -0.096  | -0.111 | 1.476 | Klhl13        | 67455  | -0.074 | -0.135 | 1.522 |
| Aif1l         | 108897 | -0.339  | -0.158 | 1.93  | Kntc1         | 208628 | 0.1    | 0.18   | 1.348 |
| Akr1b10       | 67861  | 0.065   | 0.135  | 1.044 | Lama5         | 16776  | 0.106  | 0.16   | 1.165 |
| Akr1c14       | 105387 | 0.05    | 0.253  | 1.474 | Lass3         | 545975 | 0.461  | 0.436  | 1.278 |

|           |        |        |        |       |          |        |        |        |       |
|-----------|--------|--------|--------|-------|----------|--------|--------|--------|-------|
| Akr1c19   | 432720 | -0.007 | 0.609  | 1.43  | Ldhb     | 16832  | -0.01  | 0.044  | 1.158 |
| Amotl1    | 75723  | 0.092  | 0.276  | 1.062 | Leprel2  | 14789  | -0.192 | 0.153  | 1.222 |
| Ampd3     | 11717  | 0.008  | 1.407  | 2.131 | Lhfp     | 108927 | 0.265  | 0.107  | 1.2   |
| Ankle1    | 234396 | 0.127  | 0.415  | 1.732 | Lhfp12   | 218454 | 0.169  | 1.164  | 1.765 |
| Anubl1    | 67492  | 0.044  | 0.305  | 1.048 | Lmo1     | 109594 | -0.106 | 0.067  | 1.327 |
| Anxa1     | 16952  | 0.116  | 0.814  | 2.489 | Lox      | 16948  | 0.264  | 0.558  | 2.435 |
| Anxa8     | 11752  | 0.195  | 0.195  | 1.942 | Lpcat1   | 210992 | -0.103 | 0.581  | 1.511 |
| Aplp2     | 11804  | -0.115 | 0.139  | 1.116 | Lrrc49   | 102747 | 0.344  | 0.516  | 1.111 |
| Apon      | 28194  | -0.214 | 0.06   | 1.018 | Ltbp2    | 16997  | 0.236  | 0.205  | 1.03  |
| Arhgap11a | 228482 | 0.316  | 0.284  | 1.046 | Ltbp3    | 16998  | 0.044  | 0.011  | 1.096 |
| Arhgap9   | 216445 | -0.069 | 0.155  | 1.441 | Mapk12   | 29857  | -0.585 | -0.246 | 1.013 |
| Arhgdig   | 14570  | 0.041  | -0.084 | 1.044 | Marcks   | 17118  | 0.255  | 1.788  | 2.411 |
| Asb5      | 76294  | 0.014  | 0.576  | 2.381 | Marco    | 17167  | 0.189  | 0.013  | 1.469 |
| Ascl2     | 17173  | -0.114 | 1.145  | 1.089 | Mark1    | 226778 | -0.43  | 0.315  | 1.362 |
| Aspm      | 12316  | -0.195 | 0.593  | 1.896 | Mastl    | 67121  | -0.078 | -0.005 | 1.313 |
| Atf1      | 73991  | 0.108  | -0.091 | 1.71  | Mbnl3    | 171170 | -0.183 | -0.218 | 1.083 |
| Atp1a4    | 27222  | -0.654 | -0.145 | 1.522 | Mdk      | 17242  | -0.029 | 0.174  | 1.416 |
| Aurka     | 20878  | -0.122 | 0.765  | 1.566 | Melk     | 17279  | -0.034 | 0.307  | 1.099 |
| Aurkb     | 20877  | -0.253 | 0.214  | 1.369 | Mest     | 17294  | -0.206 | 0.895  | 1.312 |
| Auts2     | 319974 | -0.863 | -0.385 | 1.213 | Micall2  | 231830 | -0.023 | 0.964  | 1.244 |
| Axl       | 26362  | 0.177  | 0.084  | 1.861 | Mki67    | 17345  | 0.003  | 0.484  | 1.627 |
| B4galt6   | 56386  | 0.063  | -0.063 | 1.317 | Mlf1     | 17349  | 0.065  | 0.489  | 1.501 |
| BC053749  | 333193 | 0.169  | 0.388  | 1.107 | Mllt11   | 56772  | 0.037  | 0.84   | 1.511 |
| Bcl2l15   | 229672 | 0.087  | 0.532  | 1.31  | Mlph     | 171531 | 0.196  | 0.189  | 2.006 |
| Bcl9      | 77578  | 0.14   | 0.82   | 1.026 | Mmp11    | 17385  | -0.439 | 0.286  | 1.277 |
| Bicc1     | 83675  | -0.02  | -0.099 | 1.457 | Mns1     | 17427  | -0.117 | 0.016  | 1.051 |
| Birc5     | 11799  | 0.051  | 0.191  | 1.097 | Ms4a4d   | 66607  | -0.073 | 0.244  | 2.635 |
| Bmf       | 171543 | -0.397 | 0.646  | 1.62  | Msln     | 56047  | 1.109  | 0.728  | 2.647 |
| Bmper     | 73230  | -0.098 | 0.526  | 1.14  | Mst1r    | 19882  | -0.288 | 0.32   | 1.148 |
| Bst1      | 12182  | -0.164 | 0.852  | 4.009 | Mxra8    | 74761  | 0.417  | 0.291  | 1.659 |
| Bub1      | 12235  | -0.212 | 0.285  | 1.593 | Mybl1    | 17864  | 0.263  | 0.686  | 1.115 |
| Bub1b     | 12236  | -0.06  | 0.314  | 1.634 | Mybl2    | 17865  | -0.047 | 0.328  | 1.494 |
| C1qtnf1   | 56745  | 0.045  | -0.047 | 1.286 | Myom2    | 17930  | -0.349 | 0.297  | 1.975 |
| C79407    | 217653 | -0.793 | 0.135  | 1.172 | Myom3    | 242702 | -0.582 | 1.454  | 1.93  |
| Cachd1    | 320508 | 0.114  | 0.997  | 1.092 | Mzfl     | 109889 | -0.224 | 0.566  | 1.03  |
| Calr3     | 73316  | 0.02   | 0.264  | 1.247 | Naalad12 | 635702 | 0.097  | 0.186  | 1.171 |
| Capsl     | 75568  | 0.405  | 0.795  | 2.146 | Naip2    | 17948  | 0.209  | 0.244  | 2.479 |
| Case5     | 76464  | 0.047  | 0.016  | 1.48  | Ncapd2   | 68298  | 0.076  | 0.243  | 1.213 |
| Casp4     | 12363  | -0.274 | 1.214  | 1.149 | Ncf4     | 17972  | -0.642 | 0.704  | 1.576 |
| Cbr3      | 109857 | -0.121 | 1.701  | 1.779 | Ndc80    | 67052  | 0.051  | 0.173  | 1.189 |
| Ccdc18    | 73254  | 0.443  | 0.334  | 1.72  | Nedd41   | 83814  | 0.129  | 0.375  | 1.892 |
| Ccdc89    | 70054  | 0.251  | 0.898  | 1.103 | Nedd9    | 18003  | -0.443 | 0.033  | 1.321 |
| Cck       | 12424  | -0.034 | 0.255  | 1.019 | Neil3    | 234258 | -0.39  | 0.425  | 1.922 |
| Ccl3      | 20302  | 1.658  | 2.835  | 3.206 | Nek2     | 18005  | 0.138  | 0.172  | 1.353 |
| Ccl7      | 20306  | 0.026  | 0.857  | 1.389 | Nfasc    | 269116 | -0.162 | 0.083  | 1.753 |
| Ccl9      | 20308  | -0.133 | 0.007  | 1.104 | Nfe2l2   | 18024  | -0.209 | 0.857  | 1.338 |
| Ccna2     | 12428  | -0.309 | 0.254  | 1.503 | Nid1     | 18073  | 0.24   | 0.684  | 1.103 |
| Ccnb2     | 12442  | -0.122 | 0.434  | 1.869 | Noxo1    | 71893  | -0.308 | 1.199  | 0.851 |
| Ccnd1     | 12443  | -0.085 | 0.521  | 1.314 | Npr3     | 18162  | -0.152 | 0.014  | 1.042 |
| Ccnf      | 12449  | -0.203 | 0.523  | 1.095 | Nqo1     | 18104  | 0.213  | 0.718  | 1.075 |
| Cct6b     | 12467  | 0.587  | 0.48   | 1.339 | Nr0b2    | 23957  | -1.549 | 0.722  | 2.304 |
| Cd24a     | 12484  | -0.14  | 0.12   | 1.311 | Nsl1     | 381318 | -0.035 | 0.708  | 1.188 |
| Cd34      | 12490  | -0.348 | -0.201 | 1.692 | Ntn3     | 18209  | 0.542  | 0.914  | 1.264 |
| Cd36      | 12491  | -0.352 | -0.163 | 1.838 | Nuf2     | 66977  | -0.109 | 0.123  | 1.481 |
| Cdc20     | 107995 | -0.234 | 0.874  | 2.087 | Nusap1   | 108907 | -0.177 | 0.307  | 1.518 |
| Cdc25b    | 12531  | -0.657 | 0.753  | 1.831 | Oip5     | 70645  | -0.401 | -0.03  | 1.127 |
| Cdc42ep2  | 104252 | 0.135  | 0.469  | 1.346 | Osbpl3   | 71720  | 0.039  | 0.358  | 1.418 |
| Cdca2     | 108912 | -0.418 | 0.213  | 1.399 | Ovgp1    | 12659  | 0.181  | 0.144  | 1.539 |
| Cdca3     | 14793  | -0.086 | 0.48   | 1.572 | Pak3     | 18481  | 0.201  | 0.185  | 1.668 |
| Cdk1      | 12534  | -0.208 | 0.199  | 1.33  | Palmd    | 114301 | -0.173 | -0.195 | 1.085 |
| Cdkn2c    | 12580  | -0.081 | 0.778  | 1.207 | Pamr1    | 210622 | -0.431 | -0.199 | 1.218 |
| Cdkn3     | 72391  | 0.111  | 0.288  | 2.299 | Parm1    | 231440 | 0.44   | 0.29   | 1.421 |
| Cdo1      | 12583  | -0.232 | 1.038  | 1.591 | Patz1    | 56218  | -0.152 | 0.109  | 1.079 |
| Cdon      | 57810  | -0.026 | 0.847  | 1.411 | Pbk      | 52033  | -0.067 | -0.091 | 1.037 |
| Cebpd     | 12609  | -0.177 | 1.849  | 1.595 | Pcolce   | 18542  | 0.033  | -0.129 | 1.323 |
| Cenpa     | 12615  | -0.121 | 0.452  | 1.565 | Pdcd4    | 18569  | 0.147  | 0.34   | 1.025 |
| Cenpe     | 229841 | -0.113 | 0.598  | 1.733 | Pdpn     | 14726  | 0.399  | 0.884  | 3.108 |
| Cenpi     | 102920 | 0.063  | 0.324  | 1.124 | Pdzk1ip1 | 67182  | -0.079 | 0.065  | 1.232 |
| Cenpm     | 66570  | -0.466 | 0.117  | 1.925 | Pkm2     | 18746  | 0.125  | 0.261  | 1.38  |
| Cenpn     | 72155  | 0.091  | 0.032  | 1.15  | Pla2r1   | 18779  | 0.068  | 0.084  | 1.243 |
| Cep55     | 74107  | 0.114  | 0.005  | 1.056 | Plk1     | 18817  | -0.312 | 0.649  | 1.86  |
| Chst7     | 60322  | 0.418  | 0.434  | 1.49  | Pmp22    | 18858  | 0.001  | 0.032  | 1.206 |
| Chtf18    | 214901 | 0.054  | 0.305  | 1.034 | Ppic     | 19038  | 0.035  | 0.603  | 1.94  |
| Ckap2     | 80986  | -0.091 | 0.386  | 1.363 | Prc1     | 233406 | 0.043  | 0.237  | 1.007 |

|               |        |        |        |       |           |        |        |        |       |
|---------------|--------|--------|--------|-------|-----------|--------|--------|--------|-------|
| Ckap2l        | 70466  | 0.012  | 0.136  | 1.811 | Prr1l     | 270906 | -0.541 | 0.154  | 1.543 |
| Ckap4         | 216197 | -0.073 | 0.544  | 1.4   | Prrx1     | 18933  | -0.014 | 0.217  | 1.395 |
| Clec4d        | 17474  | 0.405  | 1.481  | 2.802 | Prss23    | 76453  | 0.138  | 0.676  | 1.465 |
| Cln6          | 76524  | -0.023 | 0.006  | 1.087 | Ptchd1    | 211612 | 0.413  | 1.469  | 1.978 |
| Clspn         | 269582 | 0.107  | 0.378  | 1.177 | Ptpn18    | 19253  | -0.453 | 0.3    | 1.325 |
| Cmtm3         | 68119  | -0.24  | 0.47   | 1.211 | Ptpru     | 19273  | -0.148 | 0.402  | 1.281 |
| Col4a5        | 12830  | 0.066  | 0.151  | 1.215 | Pttgl     | 30939  | -0.255 | 0.411  | 1.44  |
| Col5a3        | 53867  | -0.485 | -0.038 | 2.216 | Pxdn      | 69675  | 0.035  | 0.856  | 1.706 |
| Cpt1c         | 78070  | 0.111  | 0.435  | 1.297 | Rac2      | 19354  | -0.518 | 1.66   | 1.513 |
| Crip1         | 12925  | 0.015  | 0.108  | 1.589 | Racgap1   | 26934  | 0.035  | 0.272  | 1.35  |
| Csfl          | 12977  | 0.264  | 0.96   | 1.978 | Rad51     | 19361  | -0.024 | 0.237  | 1.144 |
| Csf2          | 12981  | 1.123  | 2.4    | 2.951 | Rad51l1   | 19363  | 0.222  | 0.169  | 1.517 |
| Cst6          | 73720  | 0.186  | 0.12   | 1.054 | Rapgef3   | 223864 | -0.077 | 0.868  | 1.91  |
| Ctsc          | 13032  | 0.17   | 0.535  | 1.218 | Rasl12    | 70784  | -0.059 | 0.624  | 1.703 |
| Cxcl3         | 330122 | 0.056  | 3.483  | 3.803 | Rgl1      | 19731  | -0.129 | 0.968  | 1.966 |
| Cxcl5         | 20311  | -0.003 | 5.013  | 5.886 | Rgs4      | 19736  | -0.545 | 0.185  | 2.232 |
| Cyb5          | 109672 | -0.329 | 0.247  | 1.303 | Rnf219    | 72486  | -0.407 | 0.063  | 1.024 |
| Cyba          | 13057  | -0.25  | 0.292  | 1.257 | Rrm2      | 20135  | -0.143 | 0.29   | 1.067 |
| Cyp21a1       | 13079  | -0.036 | 0.33   | 1.381 | Rspo3     | 72780  | 0.02   | 1.081  | 1.485 |
| Cyp26a1       | 13082  | -0.696 | 0.095  | 1.005 | Rtn1      | 104001 | -0.71  | 0.316  | 1.397 |
| Cyp2a4        | 13086  | 0.151  | -0.018 | 1.069 | Rttm      | 246102 | 0.492  | 0.491  | 1.442 |
| Cys1          | 12879  | -0.383 | 0.38   | 1.316 | Saa4      | 20211  | -0.247 | 0.897  | 1.534 |
| Cysltr1       | 58861  | 0.108  | 0.907  | 2.92  | Samd14    | 217125 | -0.549 | 0.053  | 1.038 |
| Dbn1          | 56320  | 0.021  | 0.032  | 1.482 | Samd5     | 320825 | 0.195  | 0.328  | 2.152 |
| Dcdc2a        | 195208 | 0.545  | 1.003  | 1.101 | Sbsn      | 282619 | -0.041 | -0.028 | 1.51  |
| Depdc1a       | 76131  | -1.189 | 0.651  | 2.654 | Scara3    | 219151 | -0.301 | 0.288  | 2.196 |
| Depdc1b       | 218581 | -0.144 | 0.285  | 1.546 | Scarf2    | 224024 | -0.065 | 0.427  | 1.804 |
| Dgat2         | 67800  | -0.521 | 2.091  | 2.186 | Scrn1     | 69938  | -1.141 | -0.502 | 0.785 |
| Dhh           | 13363  | 0.118  | 0.512  | 1.786 | Scube3    | 268935 | -0.091 | 0.226  | 1.835 |
| Dhrs3         | 20148  | -0.498 | 1.233  | 2.303 | Sdpr      | 20324  | -0.131 | -0.199 | 1.551 |
| Dlgap5        | 218977 | -0.217 | -0.074 | 1.294 | Selenbp1  | 20341  | -0.178 | -0.115 | 1.427 |
| Dock11        | 75974  | -0.394 | 0.054  | 2.202 | Selp      | 20344  | -0.296 | 0.871  | 2.127 |
| Dram1         | 71712  | -0.132 | 0.98   | 1.672 | Sema3c    | 20348  | 0.239  | 0.431  | 1.943 |
| Dusp13        | 27389  | 0.305  | 0.217  | 1.005 | Sema3e    | 20349  | 0.03   | 0.149  | 1.055 |
| Dydc2         | 71200  | 0.021  | 0.233  | 1.131 | Sept4     | 18952  | 0.552  | 0.154  | 2.525 |
| Dynl1l        | 56455  | -0.662 | 0.315  | 1.016 | Serpina3f | 238393 | -0.119 | 0.547  | 1.079 |
| Dzip1l        | 72507  | -1.412 | -0.529 | 0.906 | Serpinb1b | 282663 | -0.069 | 0.763  | 1.435 |
| E130012A19Rik | 103551 | 0.031  | 0.444  | 1.112 | Serpinb2  | 18788  | 0.035  | 0.813  | 1.502 |
| E130306D19Rik | 230098 | -0.464 | 1.101  | 2.066 | Serpine1  | 18787  | 0.197  | 0.508  | 1.07  |
| E230008O15Rik | 319862 | 0.086  | 0.692  | 1.085 | Sftpd     | 20390  | -0.582 | 1.237  | 2.596 |
| Ecsr          | 68545  | -0.016 | 0.088  | 1.178 | Sgol1     | 72415  | -0.213 | 0.429  | 1.229 |
| Ect2          | 13605  | 0.081  | 0.259  | 1.25  | Sgol2     | 68549  | 0.161  | 0.342  | 1.411 |
| Efemp1        | 216616 | 0.129  | 0.121  | 1.603 | Shcbp1    | 20419  | -0.105 | -0.079 | 1.296 |
| Ehf           | 13661  | -0.383 | 1.998  | 2.226 | Sipa1l1   | 217692 | -0.122 | 0.449  | 1.107 |
| Elac1         | 114615 | -0.187 | 0.455  | 1.488 | Ska1      | 66468  | 0.052  | 0.133  | 1.073 |
| Epdr1         | 105298 | -0.236 | 0.069  | 1.685 | Slc16a3   | 80879  | -0.068 | -0.009 | 1.519 |
| Esco2         | 71988  | -0.019 | 0.288  | 1.217 | Slc17a1   | 20504  | -0.052 | 0.344  | 1.909 |
| Esm1          | 71690  | 0.062  | 0.76   | 2.441 | Slc1a2    | 20511  | -0.205 | 0.34   | 1.512 |
| Espl1         | 105988 | -0.812 | 0.047  | 1.548 | Slc1a5    | 20514  | -0.135 | 1.298  | 1.203 |
| Evl           | 14026  | -0.296 | 0.186  | 1.03  | Slc29a4   | 243328 | -0.331 | -0.137 | 1.599 |
| Exo1          | 26909  | 0.034  | 0.409  | 1.351 | Slc35f2   | 72022  | 0.164  | 0.954  | 1.111 |
| F630043A04Rik | 219114 | 0.215  | 0.366  | 1.098 | Slc38a1   | 105727 | 0.462  | 0.49   | 1.313 |
| Fam120b       | 67544  | -0.273 | -0.203 | 1.129 | Slc43a2   | 215113 | 0.108  | 1.334  | 1.51  |
| Fam129b       | 227737 | 0.06   | 0.498  | 1.783 | Slc46a3   | 71706  | -0.016 | -0.113 | 1.001 |
| Fam132b       | 227358 | 0.045  | 0.06   | 1.42  | Slc7a2    | 11988  | -0.169 | 2.08   | 1.716 |
| Fam13a        | 58909  | -0.089 | 1.149  | 1.41  | Slc7a6    | 330836 | 0.016  | 1.006  | 0.89  |
| Fam164a       | 67306  | 0.014  | 0.419  | 1.034 | Slco3a1   | 108116 | -0.167 | 0.79   | 2.093 |
| Fam20a        | 208659 | -0.019 | 0.128  | 1.2   | Snap25    | 20614  | 0.133  | 0.386  | 1.071 |
| Fam43a        | 224093 | -0.137 | 0.773  | 1.275 | Snhg11    | 319317 | 1.093  | 0.661  | 1.943 |
| Fam46b        | 100342 | 0.189  | -0.056 | 1.621 | Snx18     | 170625 | -0.031 | 0.37   | 1.216 |
| Fam49a        | 76820  | -0.73  | 1.047  | 2.301 | Snx20     | 71607  | 0.082  | 0.131  | 1.312 |
| Fam55c        | 385658 | 0.057  | 0.668  | 2.274 | Sort1     | 20661  | -0.096 | -0.173 | 1.047 |
| Fam69b        | 56279  | 0.424  | 0.424  | 1.071 | Spag5     | 54141  | -0.122 | 0.416  | 1.294 |
| Fam72a        | 108900 | -0.03  | 0.544  | 1.337 | Spn       | 20737  | 0.563  | 0.525  | 1.413 |
| Fam83d        | 71878  | 0.01   | 0.769  | 1.691 | Sprr1b    | 20754  | -0.172 | 0.085  | 2.017 |
| Fanca         | 14087  | -0.055 | 0.22   | 1.299 | Sprr2a2   | 1E+08  | 0.059  | 0.078  | 1.912 |
| Fbln2         | 14115  | 0.244  | 0.318  | 2.358 | St5       | 76954  | -0.111 | 1.162  | 1.083 |
| Fbp2          | 14120  | -0.087 | 1.27   | 2.281 | Steap1    | 70358  | -0.067 | 0.039  | 1.019 |
| Fbxo17        | 50760  | -0.31  | 0.069  | 1.048 | Steap2    | 74051  | 0.053  | 0.395  | 1.502 |
| Fgfl3         | 14168  | 0.134  | 0.287  | 1.143 | Steap4    | 117167 | -0.311 | 1.62   | 1.332 |
| Fgf23         | 64654  | 0.106  | 0.475  | 1.077 | Sult1c2   | 69083  | -0.42  | 0.156  | 1.324 |
| Fgf           | 14205  | 0.226  | 0.459  | 1.453 | Sult2b1   | 54200  | -0.565 | 0.806  | 1.733 |
| Fkbp7         | 14231  | 0.066  | 0.387  | 1.086 | Sult4a1   | 29859  | -0.185 | -0.065 | 1.043 |
| Fmo5          | 14263  | -0.447 | 0.002  | 1.049 | Susd2     | 71733  | -0.095 | 1.223  | 1.166 |

|           |        |        |        |       |          |        |        |        |       |
|-----------|--------|--------|--------|-------|----------|--------|--------|--------|-------|
| Fpr1      | 14293  | -0.518 | 0.643  | 1.393 | Tacc3    | 21335  | -0.097 | 0.251  | 1.09  |
| Fscn1     | 14086  | -0.489 | -0.101 | 1.276 | Tbx1     | 21380  | -0.189 | 0.817  | 1.715 |
| Fut4      | 14345  | -1.264 | 0.077  | 1.566 | Tdo2     | 56720  | -0.457 | -0.289 | 1.274 |
| Fxyd5     | 18301  | 0.101  | -0.009 | 1.13  | Tffl     | 21784  | 0.209  | 0.372  | 1.63  |
| Fzd8      | 14370  | -0.134 | 0.414  | 1.007 | Tfpi     | 21788  | -0.044 | 0.93   | 2.006 |
| Galnt12   | 230145 | -0.018 | 0.55   | 1.052 | Thbd     | 21824  | 0.314  | 0.465  | 2.283 |
| Galnt3    | 14425  | 0.479  | 0.431  | 2.111 | Thbs3    | 21827  | -0.27  | 0.191  | 1.306 |
| Gas2l3    | 237436 | 0.007  | 0.391  | 1.031 | Tia1     | 21841  | 0.507  | 0.509  | 1.027 |
| Gbp4      | 17472  | -0.021 | 1.609  | 1.37  | Timp2    | 21858  | 0.138  | 0.394  | 2.493 |
| Gclc      | 14629  | -0.147 | 1.283  | 2.051 | Tinag    | 26944  | 0.08   | 0.092  | 1.756 |
| Gclm      | 14630  | 0.136  | 0.761  | 1.096 | Tlr4     | 21898  | 0.2    | 0.775  | 1.301 |
| Gdf15     | 23886  | 0.364  | 0.523  | 1.017 | Tmem130  | 243339 | -0.015 | 0.099  | 1.513 |
| Gdpd5     | 233552 | -0.023 | 0.569  | 1.783 | Tmem86a  | 67893  | -0.207 | 0.131  | 1.245 |
| Gen1      | 209334 | -0.099 | 0.332  | 1.313 | Tmem8b   | 242409 | 0.323  | 0.746  | 1.202 |
| Glis2     | 83396  | -0.08  | 0.032  | 1.693 | Tnfai2   | 21928  | -0.201 | 2.169  | 1.742 |
| Gm10696   | 1E+08  | 0.43   | 0.178  | 1.229 | Tnfrsf19 | 29820  | -0.176 | -0.158 | 1.528 |
| Gm13152   | 195531 | -0.414 | 0.436  | 1.088 | Tnfsf15  | 326623 | 0.499  | 0.5    | 1.408 |
| Gm13154   | 433804 | -0.412 | 0.515  | 2.185 | Tnfsf18  | 240873 | -0.511 | 0.82   | 2.9   |
| Gm13275   | 545652 | -0.176 | 0.932  | 1.004 | Top2a    | 21973  | -0.236 | 0.195  | 1.291 |
| Gm3604    | 1E+08  | -0.702 | -0.278 | 1.045 | Tpx2     | 72119  | 0.306  | 0.318  | 1.364 |
| Gm3643    | 1E+08  | -0.052 | 1.054  | 1.051 | Trim59   | 66949  | -0.411 | 0.729  | 1.712 |
| Gm5514    | 433229 | -0.103 | 0.111  | 1.141 | Trnp1    | 69539  | -0.22  | 0.419  | 1.137 |
| Gm6320    | 622408 | 0.175  | 0.358  | 1.116 | Tspan6   | 56496  | 0.066  | 0.085  | 1.426 |
| Gm6507    | 624483 | -0.144 | 0.989  | 1.067 | Tspan8   | 216350 | -0.005 | 0.025  | 1.8   |
| Gm6653    | 626115 | -0.291 | -0.265 | 1.134 | Tspy13   | 241732 | 0.243  | 0.208  | 1.02  |
| Gm7265    | 639396 | 0.234  | 1.195  | 1.921 | Ttk      | 22137  | -0.554 | 0.136  | 1.411 |
| Gm7969    | 666185 | -0.122 | 0.09   | 1.4   | Tulp3    | 22158  | 0.402  | 0.171  | 1.091 |
| Gnai1     | 14677  | -0.037 | 0.445  | 2.189 | Txndc16  | 70561  | -0.21  | 0.002  | 1.205 |
| Gpr137b   | 83924  | 0.223  | 1.154  | 1.45  | Txnip    | 56338  | -0.037 | 0.625  | 1.828 |
| Gpr64     | 237175 | -0.097 | 0.753  | 1.455 | Ube2c    | 68612  | -0.065 | 0.602  | 1.478 |
| Gprc5b    | 64297  | -0.582 | -0.494 | 2.033 | Ucp3     | 22229  | 0.047  | -0.082 | 1.139 |
| Gpt2      | 108682 | -0.23  | 0.709  | 1.534 | Ugdh     | 22235  | -0.148 | 0.707  | 1.322 |
| Gpx8      | 69590  | -0.074 | -0.081 | 1.276 | Ugt2b35  | 243085 | -0.065 | 0.646  | 1.139 |
| Grik5     | 14809  | 0.066  | 0.809  | 1.113 | Vnn1     | 22361  | -0.151 | 0.537  | 1.555 |
| Gsta3     | 14859  | -0.08  | 0.709  | 1.933 | Vnn3     | 26464  | -0.104 | 1.431  | 2.91  |
| Gsto1     | 14873  | -0.009 | 0.221  | 1.364 | Wfdc2    | 67701  | 0.128  | 0.318  | 1.649 |
| Gtse1     | 29870  | 0.06   | 0.564  | 1.084 | Wisp1    | 22402  | 0.184  | 0.038  | 1.802 |
| Gzme      | 14942  | 0.139  | 0.728  | 1.469 | Wisp2    | 22403  | -0.381 | 0.827  | 2.988 |
| H6pd      | 100198 | 0.026  | 0.56   | 1.071 | Ypel1    | 106369 | 0.471  | 0.765  | 1.363 |
| Hamp      | 84506  | 0.102  | 0.739  | 1.126 | Zc3h12a  | 230738 | 0.16   | 1.477  | 1.262 |
| Hgd       | 15233  | -0.51  | 0.198  | 1.299 | Zfp108   | 54678  | -0.629 | 0.393  | 1.07  |
| Hist1h2bp | 319188 | 0.211  | 0.892  | 1.192 | Zfp365   | 216049 | -0.005 | 0.124  | 1.296 |
| Hist1h3g  | 97908  | -0.874 | 0.349  | 2.231 | Zfp809   | 235047 | -0.045 | 0.473  | 1.018 |
| Hk2       | 15277  | 0.073  | 0.713  | 1.324 | Zfpm2    | 22762  | 0.598  | 0.848  | 2.736 |
| Hmmr      | 15366  | -0.17  | 0.373  | 1.779 | Zmat1    | 215693 | -0.371 | 0.113  | 1.106 |
| Hoxb2     | 103889 | 0.543  | 1.235  | 2.029 | Zmynd15  | 574428 | -0.037 | 0.371  | 1.034 |
| Hpgd      | 15446  | -0.058 | -0.051 | 1.436 | Zscan29  | 99334  | 0.487  | 1.099  | 1.364 |
|           |        |        |        |       | Zwilch   | 68014  | -0.041 | 0.406  | 1.418 |

\* Fold induction represents  $\log_2$  expression ratio.

<Temporal down-pattern>

| Symbol        | Entrez | 1hr    | 6hrs   | 24hrs  | Symbol    | Entrez | 1hr    | 6hrs   | 24hrs  |
|---------------|--------|--------|--------|--------|-----------|--------|--------|--------|--------|
| 1700012L04Rik | 76383  | 0.418* | -1.026 | -1.371 | Hist1h2bb | 319178 | -2.323 | -1.804 | -1.782 |
| 1700020I14Rik | 66602  | -1.139 | -0.831 | -0.89  | Hoxb6     | 15414  | -2.337 | -2.095 | -2.179 |
| 5033411D12Rik | 192136 | -0.186 | -0.618 | -1.202 | Hpd       | 15445  | 0.001  | -0.99  | -1.887 |
| AB056442      | 171405 | 0.171  | -0.19  | -1.224 | Hrg       | 94175  | 0.178  | -0.402 | -1.284 |
| Acta1         | 11459  | 0.152  | -0.595 | -1.259 | Hsd11b1   | 15483  | -0.047 | -0.476 | -1.09  |
| Ahsg          | 11625  | -0.416 | -0.471 | -1.997 | Htr2b     | 15559  | 0.191  | -0.91  | -1.765 |
| Aim11         | 230806 | -1.248 | -1.109 | -1.015 | Igfbp2    | 16008  | -0.203 | -1.228 | -1.031 |
| Alas2         | 11656  | 0.098  | -0.718 | -1.978 | Insm1     | 53626  | 0.133  | -1.076 | -1.447 |
| Aldob         | 230163 | 0.211  | -1.187 | -3.175 | Irf7      | 54123  | 0.181  | -0.349 | -1.008 |
| Aloxe3        | 23801  | 0.251  | -0.652 | -1.466 | Itih1     | 16424  | 0.063  | -0.369 | -1.196 |
| Apoa1         | 11806  | 0.274  | -0.233 | -1.222 | Itih3     | 16426  | 0.163  | -0.221 | -1.333 |
| Apoa2         | 11807  | -0.006 | -0.589 | -1.393 | Itih4     | 16427  | 0.013  | -0.441 | -1.329 |
| Apoc3         | 11814  | -0.047 | -0.405 | -1.036 | Kirrel3   | 67703  | 0.199  | -0.571 | -1.043 |
| Apoc4         | 11425  | 0.043  | -0.278 | -1.002 | Klk1      | 16612  | -2.267 | -2.667 | -2.92  |
| Apof          | 103161 | 0.017  | -0.347 | -1.052 | Klk1b5    | 16622  | -0.644 | -0.54  | -1.422 |
| Apoh          | 11818  | -0.16  | -0.487 | -1.442 | Krt17     | 16667  | 0.083  | -0.788 | -1.987 |
| Aqp1          | 11826  | -0.337 | -1.63  | -2.189 | Krtap11-1 | 16693  | 0.034  | -0.688 | -1.164 |

|          |        |        |        |        |           |        |        |        |        |
|----------|--------|--------|--------|--------|-----------|--------|--------|--------|--------|
| Areg     | 11839  | 0.585  | -0.597 | -1.613 | Lcat      | 16816  | -0.048 | -0.488 | -1.038 |
| Arid5a   | 214855 | 0.323  | 0.171  | -1.168 | Lcel1d    | 69611  | 0.219  | -0.747 | -1.398 |
| Asgr1    | 11889  | 0.189  | -0.504 | -1.982 | Lcel1f    | 67828  | 0.553  | -0.475 | -3.163 |
| Asgr2    | 11890  | 0.231  | -0.495 | -1.294 | Leap2     | 259301 | -0.133 | -0.891 | -3.128 |
| Atp12a   | 192113 | -0.46  | -0.781 | -1.251 | Lefty2    | 320202 | -3.342 | -2.784 | -2.649 |
| Azgp1    | 12007  | -0.067 | -0.271 | -1.265 | Lipc      | 15450  | 0.025  | -0.164 | -1.893 |
| BC061237 | 385138 | 0.04   | -0.146 | -1.074 | Masp1     | 17174  | 0.097  | -0.653 | -1.388 |
| BC089597 | 216454 | 0.265  | -1.243 | -2.827 | Mrc1      | 17533  | -0.415 | -2.382 | -1.801 |
| C1qc     | 12262  | -0.138 | -1.328 | -1.714 | Mug1      | 17836  | 0.07   | -0.498 | -1.781 |
| C8a      | 230558 | 0.073  | -0.543 | -1.824 | Mup21     | 381531 | 0.172  | -0.511 | -1.228 |
| C8b      | 110382 | 0.025  | -0.363 | -1.549 | Nags      | 217214 | -0.131 | -0.66  | -1.11  |
| C8g      | 69379  | 0.164  | -0.397 | -1.319 | Nipal1    | 70701  | 0.416  | 0.047  | -1.145 |
| C9       | 12279  | 0.079  | -0.648 | -1.476 | Npat      | 244879 | -1.174 | -1.116 | -1.131 |
| Car3     | 12350  | 0.16   | -0.628 | -1.638 | Nppb      | 18158  | 0.316  | -0.941 | -1.62  |
| Ccdc85b  | 240514 | -0.517 | -0.521 | -1.346 | Npy       | 109648 | 0.21   | -0.432 | -1.709 |
| Ccl5     | 20304  | 0.101  | -0.314 | -1.151 | Nrg4      | 83961  | 0.007  | -1.027 | -0.8   |
| Cfh      | 12628  | 0.051  | -0.281 | -1.029 | Oas3      | 246727 | -0.056 | -0.371 | -1.052 |
| Cfhr1    | 50702  | -0.086 | -0.576 | -1.053 | Olfr125   | 258287 | -0.456 | -0.887 | -1.099 |
| Cidea    | 12683  | 0.115  | -0.781 | -2.448 | Olfr676   | 259099 | -0.482 | -1.066 | -1.081 |
| Cldn9    | 56863  | -1.531 | -1.926 | -1.916 | Olfr740   | 258661 | 0.151  | -0.536 | -1.245 |
| Clec1b   | 56760  | -0.272 | -1.325 | -1.854 | Otc       | 18416  | 0.034  | -0.837 | -1.284 |
| Clec4g   | 75863  | -0.094 | -1.379 | -2.26  | Pax2      | 18504  | 0.07   | -0.54  | -1.28  |
| Cryaa    | 12954  | -0.193 | -0.287 | -1.212 | Plg       | 18815  | 0.253  | -0.585 | -1.491 |
| Csdc2    | 105859 | -0.219 | -0.935 | -1.465 | Pmm1      | 29858  | 0.157  | -0.223 | -1.182 |
| Cyp1a2   | 13077  | 0.374  | -0.921 | -1.153 | Pon1      | 18979  | 0.003  | -0.627 | -1.304 |
| Cyp2a12  | 13085  | 0.082  | -0.807 | -2.207 | Prkcb     | 18751  | -0.315 | -1.904 | -1.64  |
| Cyp2c39  | 13098  | 0.132  | -0.755 | -1.557 | Prodh2    | 56189  | 0.118  | -1.331 | -2.038 |
| Cyp2c50  | 107141 | 0.177  | -0.702 | -1.704 | Proz      | 66901  | 0.165  | -0.511 | -1.374 |
| Cyp2c54  | 404195 | 0.079  | -0.746 | -1.348 | Prss22    | 70835  | -1.318 | -1.283 | -1.13  |
| Cyp2d10  | 13101  | 0.104  | -0.486 | -1.968 | Prtn3     | 19152  | -0.193 | -0.189 | -1.238 |
| Cyp2d12  | 380997 | 0.269  | -0.451 | -1.661 | Pzp       | 11287  | -0.002 | -0.476 | -1.67  |
| Cyp2d13  | 68444  | 0.237  | -0.685 | -1.005 | Rarres2   | 71660  | -0.006 | -0.355 | -1.38  |
| Cyp2d22  | 56448  | 0.351  | -0.26  | -1.319 | Rdh7      | 54150  | 0.139  | -0.91  | -2.254 |
| Cyp2d26  | 76279  | 0.26   | -0.812 | -1.644 | Reep6     | 70335  | -0.009 | -0.053 | -1.051 |
| Cyp2d34  | 223706 | 0.172  | -0.84  | -1.593 | Rgn       | 19733  | -0.016 | -0.849 | -2.036 |
| Cyp2d40  | 71754  | 0.135  | -0.644 | -1.589 | Rrad      | 56437  | 0.344  | -0.979 | -1.134 |
| Cyp2d9   | 13105  | 0.128  | -0.403 | -1.794 | Scd1      | 20249  | -0.126 | -0.694 | -1.576 |
| Cyp2e1   | 13106  | 0.124  | -0.964 | -2.948 | Sdcbp2    | 228765 | 0.345  | -1.216 | -1.971 |
| Cyp2f2   | 13107  | 0.224  | -0.704 | -1.665 | Sec14l5   | 665119 | -0.886 | -0.943 | -1.096 |
| Cyp3a11  | 13112  | 0.155  | -1.065 | -3.354 | Serpina10 | 217847 | -0.185 | -0.382 | -1.095 |
| Cyp3a16  | 13114  | 0.27   | -1.174 | -3.093 | Serpina3c | 16625  | -0.02  | -0.537 | -1.367 |
| Cyp3a25  | 56388  | 0.247  | -0.91  | -2.497 | Serpina3k | 20714  | 0.075  | -0.662 | -1.474 |
| Cyp3a59  | 1E+08  | 0.234  | -1.177 | -2.215 | Serpina3m | 20717  | -0.031 | -0.47  | -1.582 |
| Cyp4a12a | 277753 | 0.067  | -0.826 | -1.987 | Serpina3n | 20716  | 0.159  | -0.534 | -1.119 |
| Cyp4a12b | 13118  | 0.103  | -0.876 | -2.006 | Serpina6  | 12401  | 0.01   | -0.964 | -1.351 |
| Dct      | 13190  | 0.241  | -1.232 | -3.312 | Serpinc1  | 11905  | -0.018 | -0.341 | -1.349 |
| Ddn      | 13199  | 0.189  | -0.968 | -1.236 | Serpinf2  | 18816  | -0.111 | -0.403 | -1.722 |
| Dio3     | 107585 | 0.254  | -1.817 | -1.59  | Sgk2      | 27219  | 0.231  | -1.071 | -1.309 |
| Dnahc17  | 69926  | -2.265 | -1.769 | -1.644 | Slc10a2   | 20494  | -0.238 | -0.496 | -1.452 |
| Egr2     | 13654  | 0.391  | -1.816 | -1.296 | Slc13a5   | 237831 | 0.095  | -0.762 | -1.414 |
| Enho     | 69638  | -0.027 | -0.476 | -1.052 | Slc26a1   | 231583 | 0.168  | -0.219 | -1.344 |
| Fabp1    | 14080  | -0.298 | -0.817 | -2.909 | Slc27a5   | 26459  | 0.177  | -0.712 | -1.796 |
| Fabp2    | 14079  | 0.216  | -0.285 | -1.114 | Slc30a2   | 230810 | -1.798 | -1.528 | -1.531 |
| Fcgr2b   | 14130  | -0.074 | -1.073 | -1.276 | Slco1a1   | 28248  | -0.363 | -1.079 | -1.496 |
| Fgg      | 99571  | -0.508 | -0.679 | -2.023 | Spp2      | 75396  | -0.042 | -0.4   | -1.592 |
| Fgl1     | 234199 | 0.077  | 0.001  | -1.401 | Tgm1      | 21816  | -0.04  | -1.467 | -1.686 |
| Fhad1    | 329977 | 0.069  | -1.102 | -1.105 | Tmc5      | 74424  | -0.211 | -0.487 | -1.155 |
| Gm10375  | 1E+08  | 0.833  | -0.549 | -1.434 | Tmed6     | 66269  | -0.491 | -0.966 | -1.25  |
| Gm1045   | 381651 | 0.146  | -0.199 | -1.464 | Tpm2      | 22004  | 0.082  | -0.37  | -1.039 |
| Gm14483  | 1E+08  | 0.137  | -0.817 | -1.504 | Trpm5     | 56843  | 0.005  | -1.08  | -1.492 |
| Gm14484  | 547160 | 0.36   | -0.477 | -1.571 | Ttr       | 22139  | -0.12  | -0.641 | -1.039 |
| Gm3448   | 1E+08  | 0.054  | -0.427 | -1.481 | Ubd       | 24108  | -0.113 | -0.03  | -1.133 |
| Gm4906   | 236663 | 0.638  | -0.446 | -1.088 | Ube2ql1   | 76980  | 0.158  | -1.144 | -1.287 |
| Gm5132   | 333452 | 0.107  | -0.734 | -1.03  | Ugr2b1    | 71773  | -0.139 | -1.218 | -2.48  |
| Gm5382   | 385328 | 0.044  | -0.719 | -1.511 | Ugt3a1    | 105887 | -0.023 | -0.608 | -1.243 |
| Gnmt     | 14711  | 0.14   | -0.483 | -1.237 | Ugt3a2    | 223337 | -0.157 | -0.452 | -1.503 |
| H2-M9    | 14997  | -0.152 | -0.715 | -1.177 | Uox       | 22262  | 0.071  | -0.595 | -1.433 |
| H2-Q1    | 15006  | 0.143  | -0.823 | -1.883 | Upb1      | 103149 | -0.071 | -0.719 | -1.342 |
| H2-Q10   | 15007  | 0.052  | -0.318 | -1.121 | Uroc1     | 243537 | 0.084  | -0.923 | -1.533 |
| Hao1     | 15112  | 0.056  | -0.296 | -1.192 | Uts2      | 24111  | 0.122  | -0.791 | -1.236 |
| Hc       | 15139  | 0.113  | -0.319 | -1.233 | Vsig4     | 278180 | 0.118  | -1.213 | -1.905 |

\* Fold induction represents log<sub>2</sub> expression ratio.

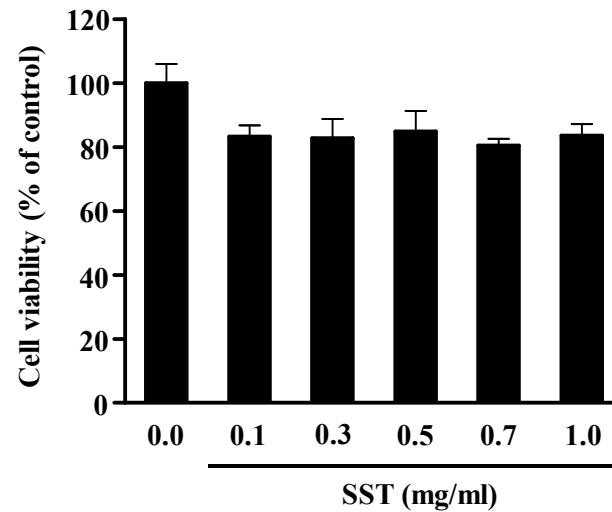

**Figure S1.** The cytotoxic effect of Sho-saiko-to (SST) on primary hepatocytes. Hepatocytes are first cultured in 48-well plates at a density of  $1.0 \times 10^5$  cells/well for 24 hours. After incubation, the cells are washed with phosphate-buffered saline and treated with different concentrations of SST (0.1–1.0 mg/mL) for 24 hours. Viability is measured in triplicate by using an *in vitro* colorimetric method (i.e., methyl thiazolyl tetrazolium [MTT] assay). The viability is presented as the mean  $\pm$  standard deviation (S.D.).

## Genes

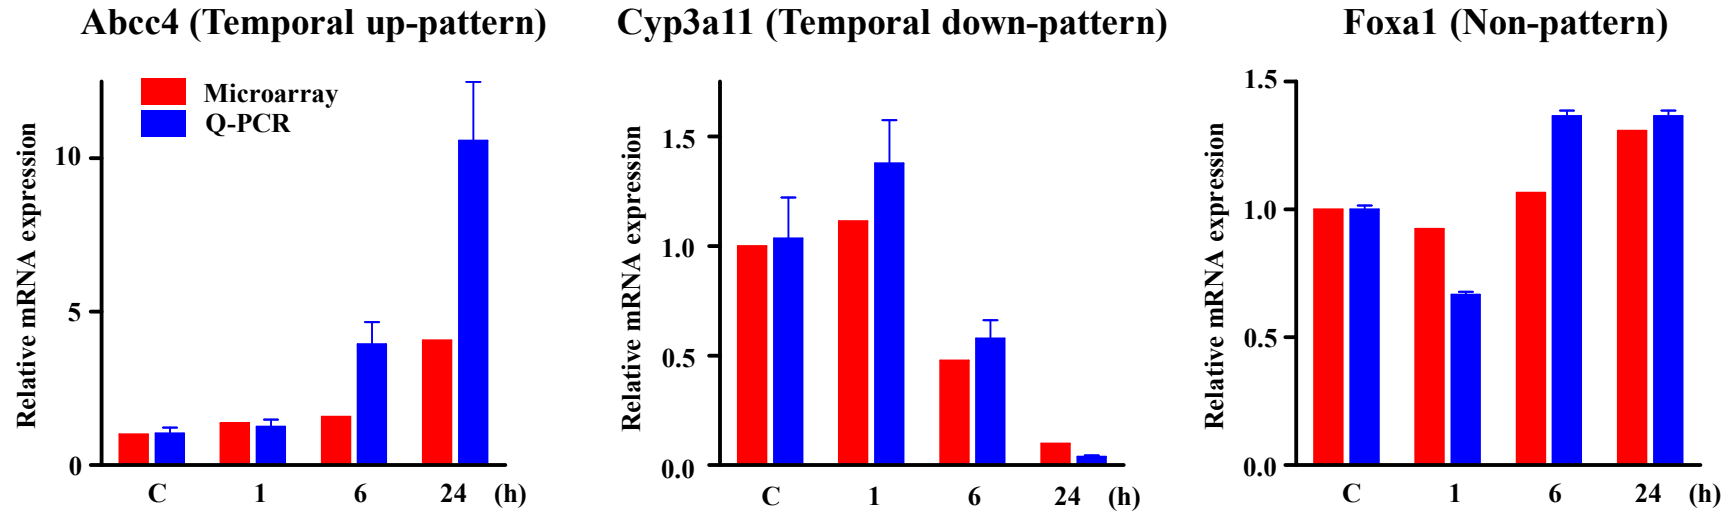

## MicroRNAs

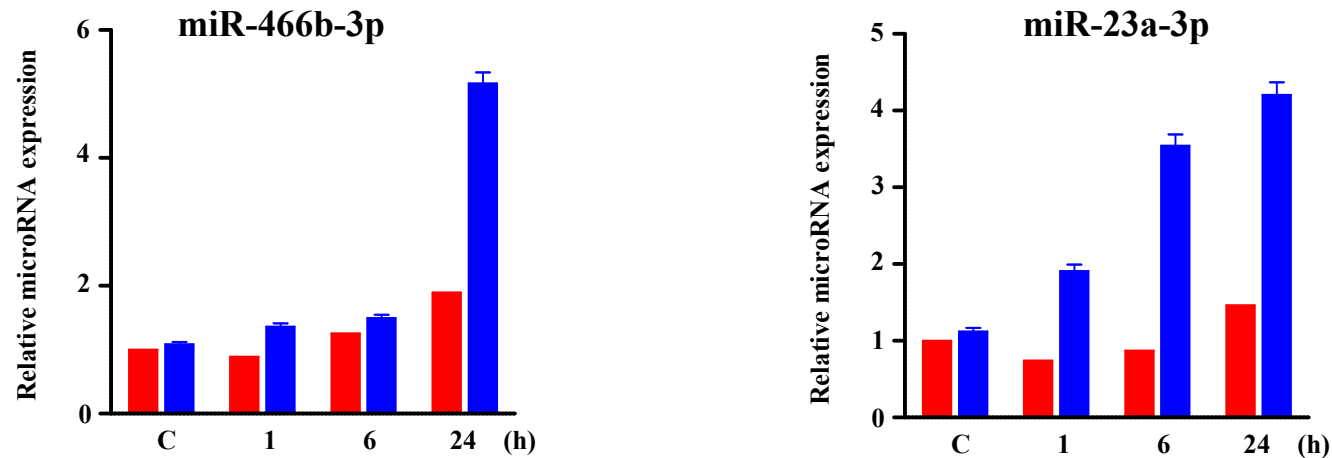

Figure S2. Quantitative real-time polymerase chain reaction (Q-PCR). Mouse primary hepatocytes are treated with 500  $\mu\text{g/mL}$  of SST at a density of  $1.0 \times 10^6$  cells/60mm dish for 1–24 hours in triplicate. The mRNA and microRNA are then reverse-transcribed, amplified, and detected by using Taqman probes (ABI, USA). The Q-PCR results are presented as the mean  $\pm$  standard deviation (S.D.).

# Pathways from temporal up-pattern (KEGG ID)

Cytokine-cytokine receptor interaction (mmu04060)

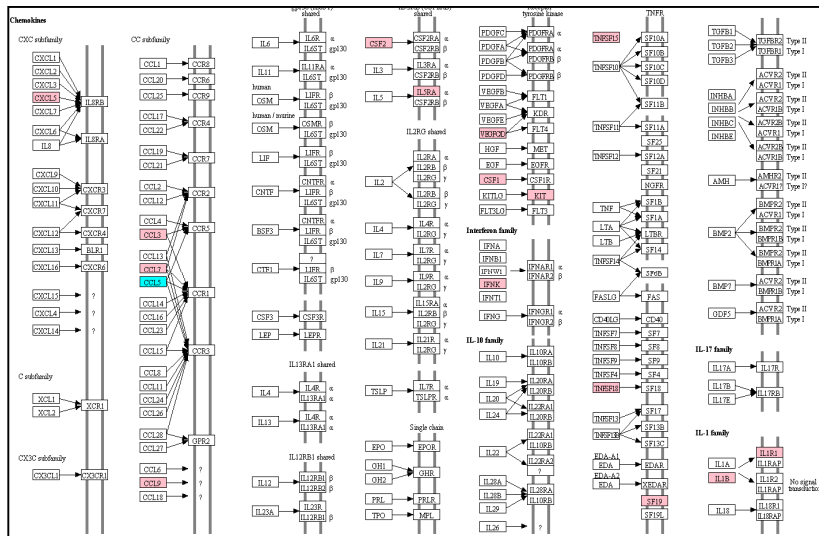

Osteoclast differentiation (mmu04380)

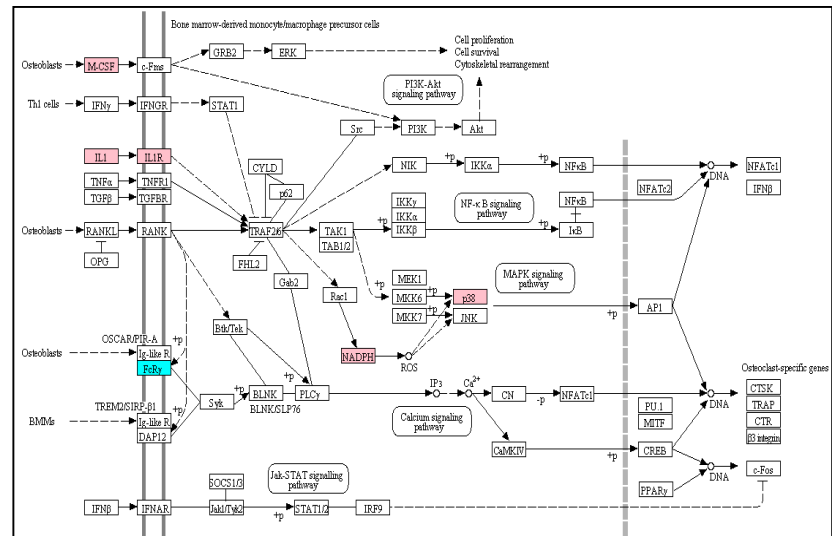

Cell cycle (mmu04110)

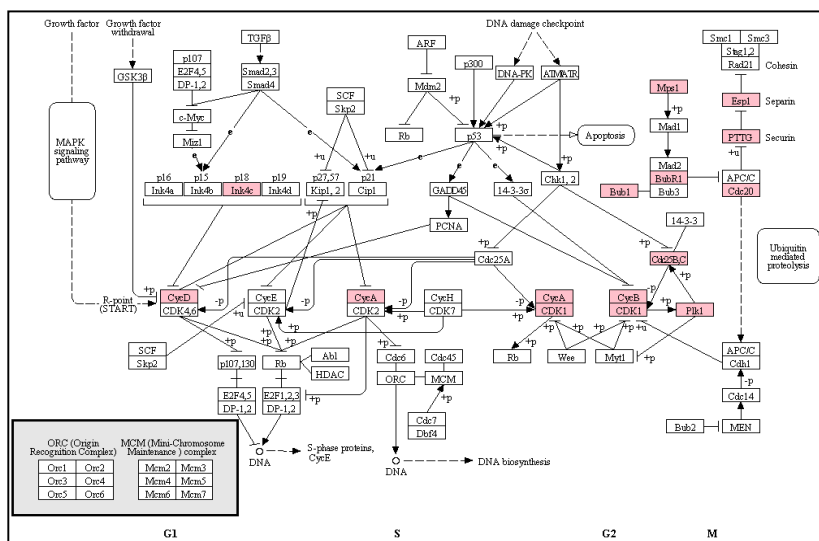

NF-kappa B signaling pathway (mmu04064)

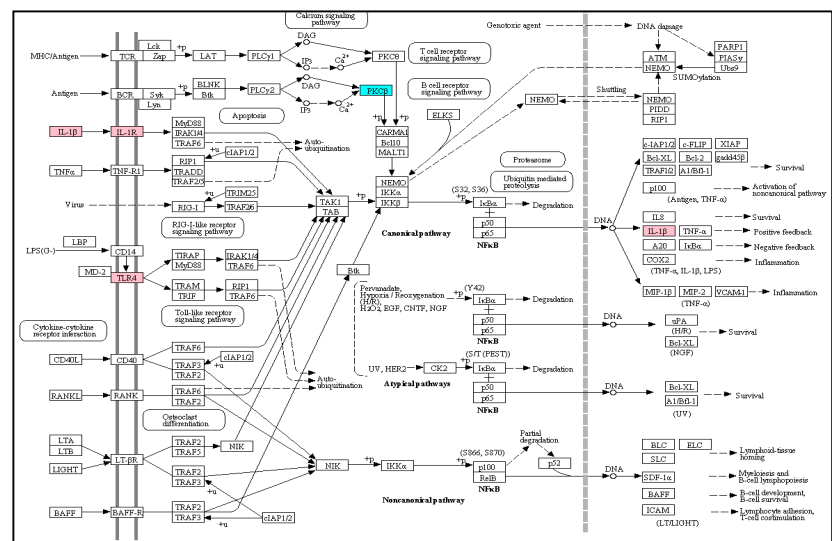

Figure S3. Pathways enriched in the temporal up-pattern and temporal down-pattern. The position of each gene is denoted by red for the temporal up-pattern or blue for the temporal down-pattern in the pathways.



# Pathways from temporal up-pattern (KEGG ID)

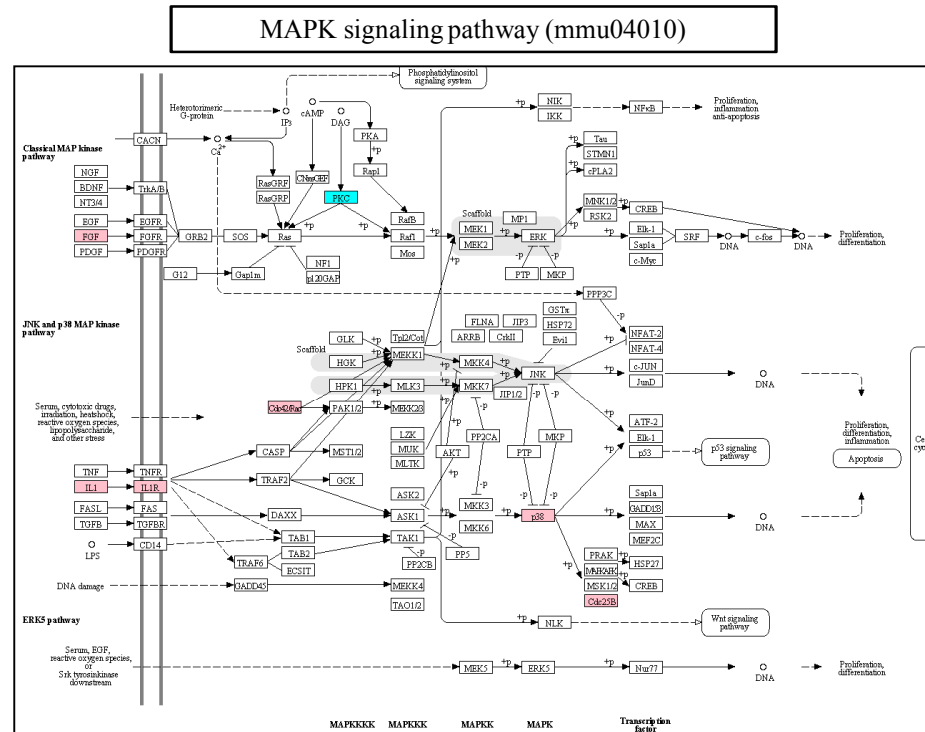

Figure S3. Continued.

# Pathways from temporal down-pattern (KEGG ID)

## Systemic lupus erythematosus (mmu05322)

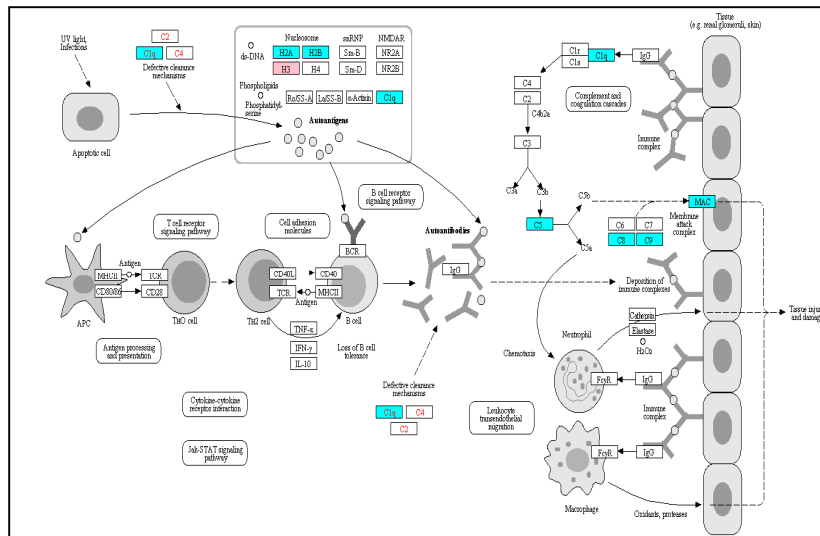

## Complement and coagulation cascades (mmu04610)

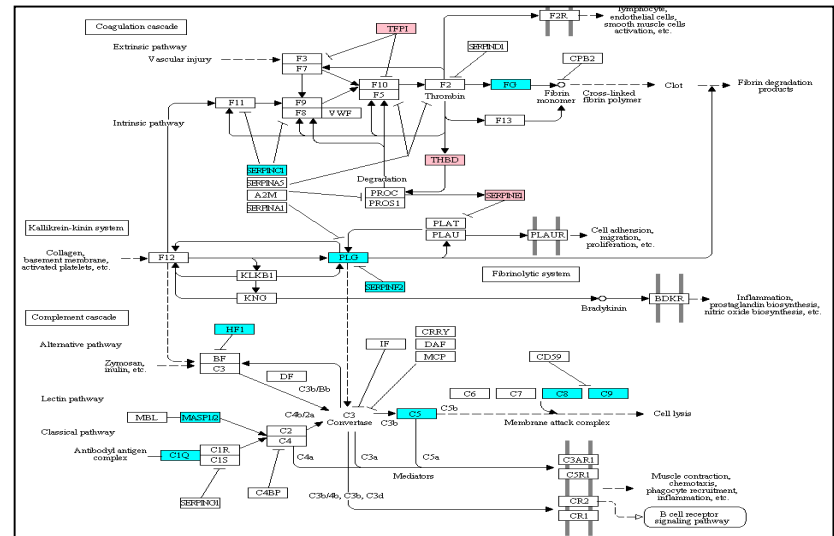

## Prion diseases (mmu05020)

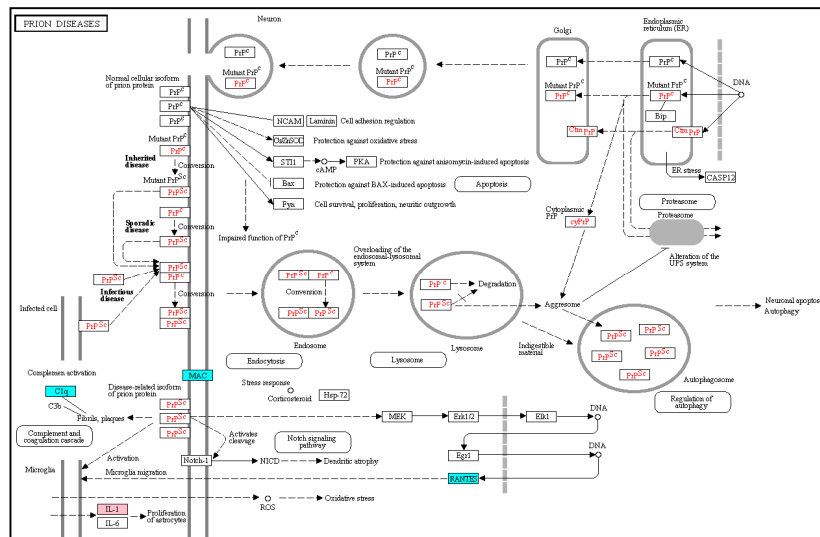

## PPAR signaling pathway (mmu03320)

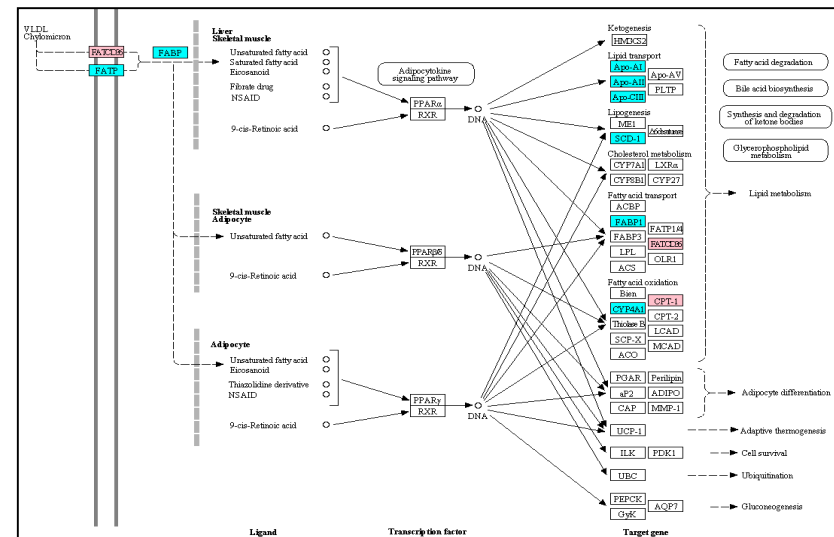

Figure S3. Continued.

# Pathways from temporal down-pattern (KEGG ID)

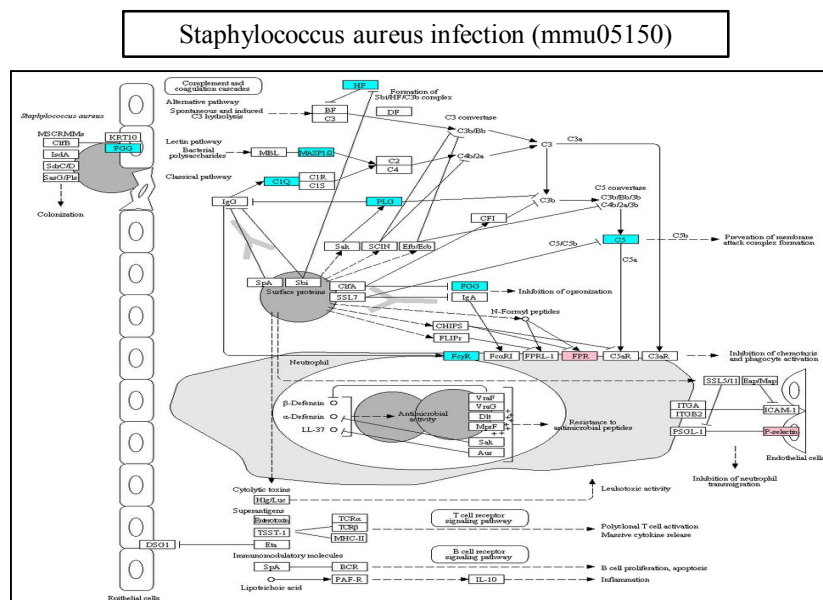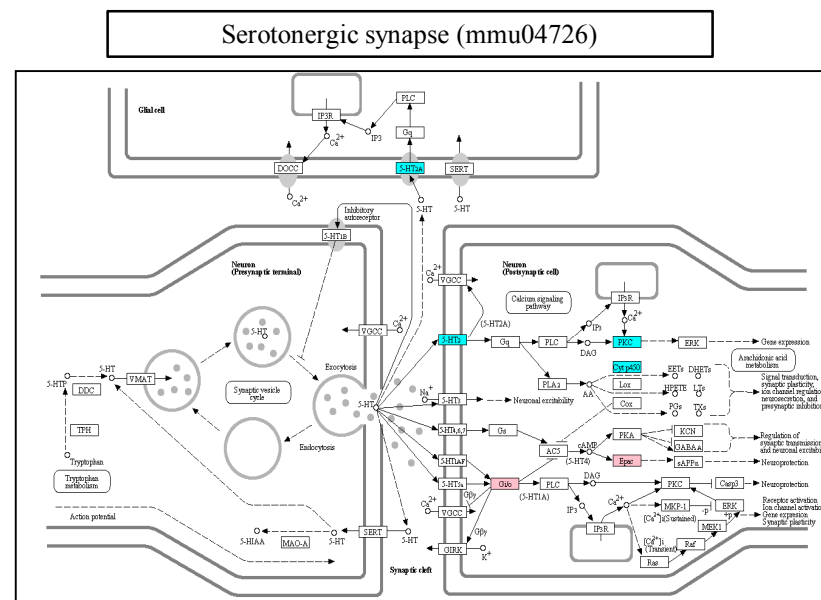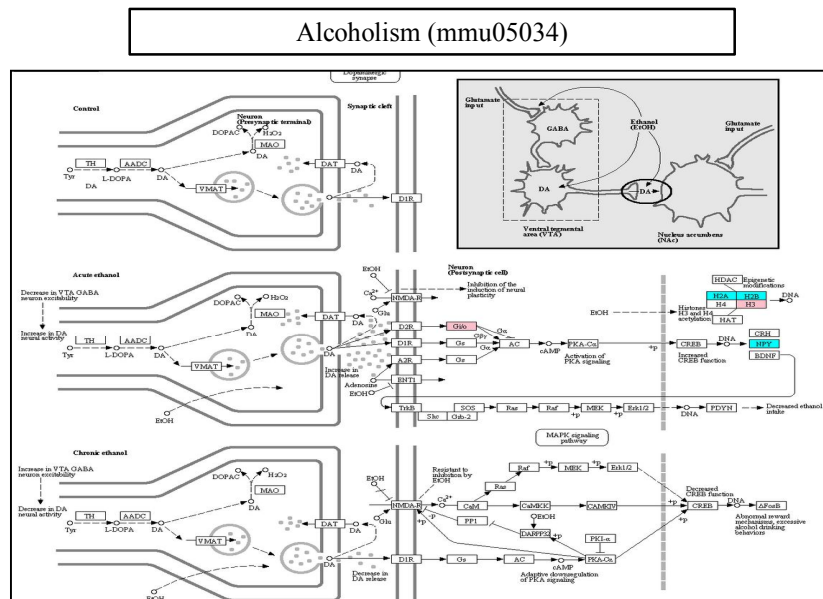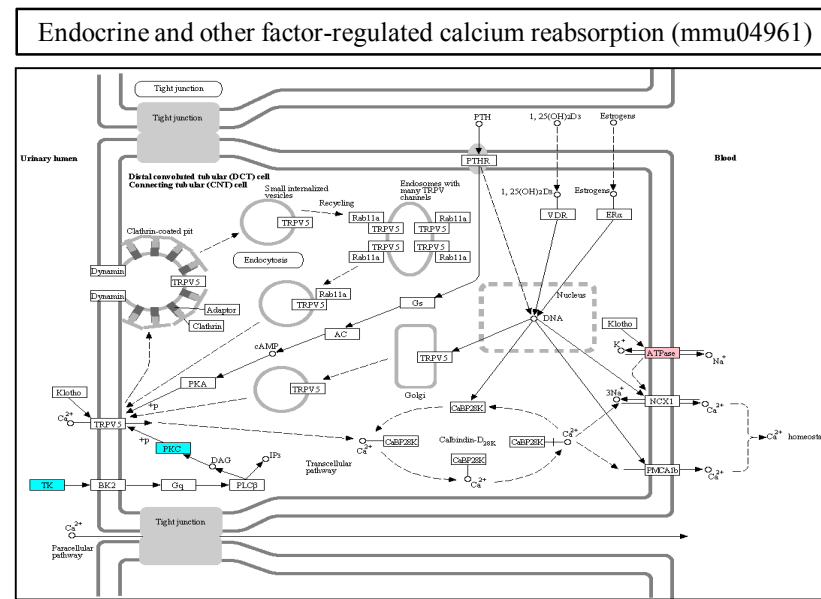

Figure S3. Continued.

# Pathways from temporal down-pattern (KEGG ID)

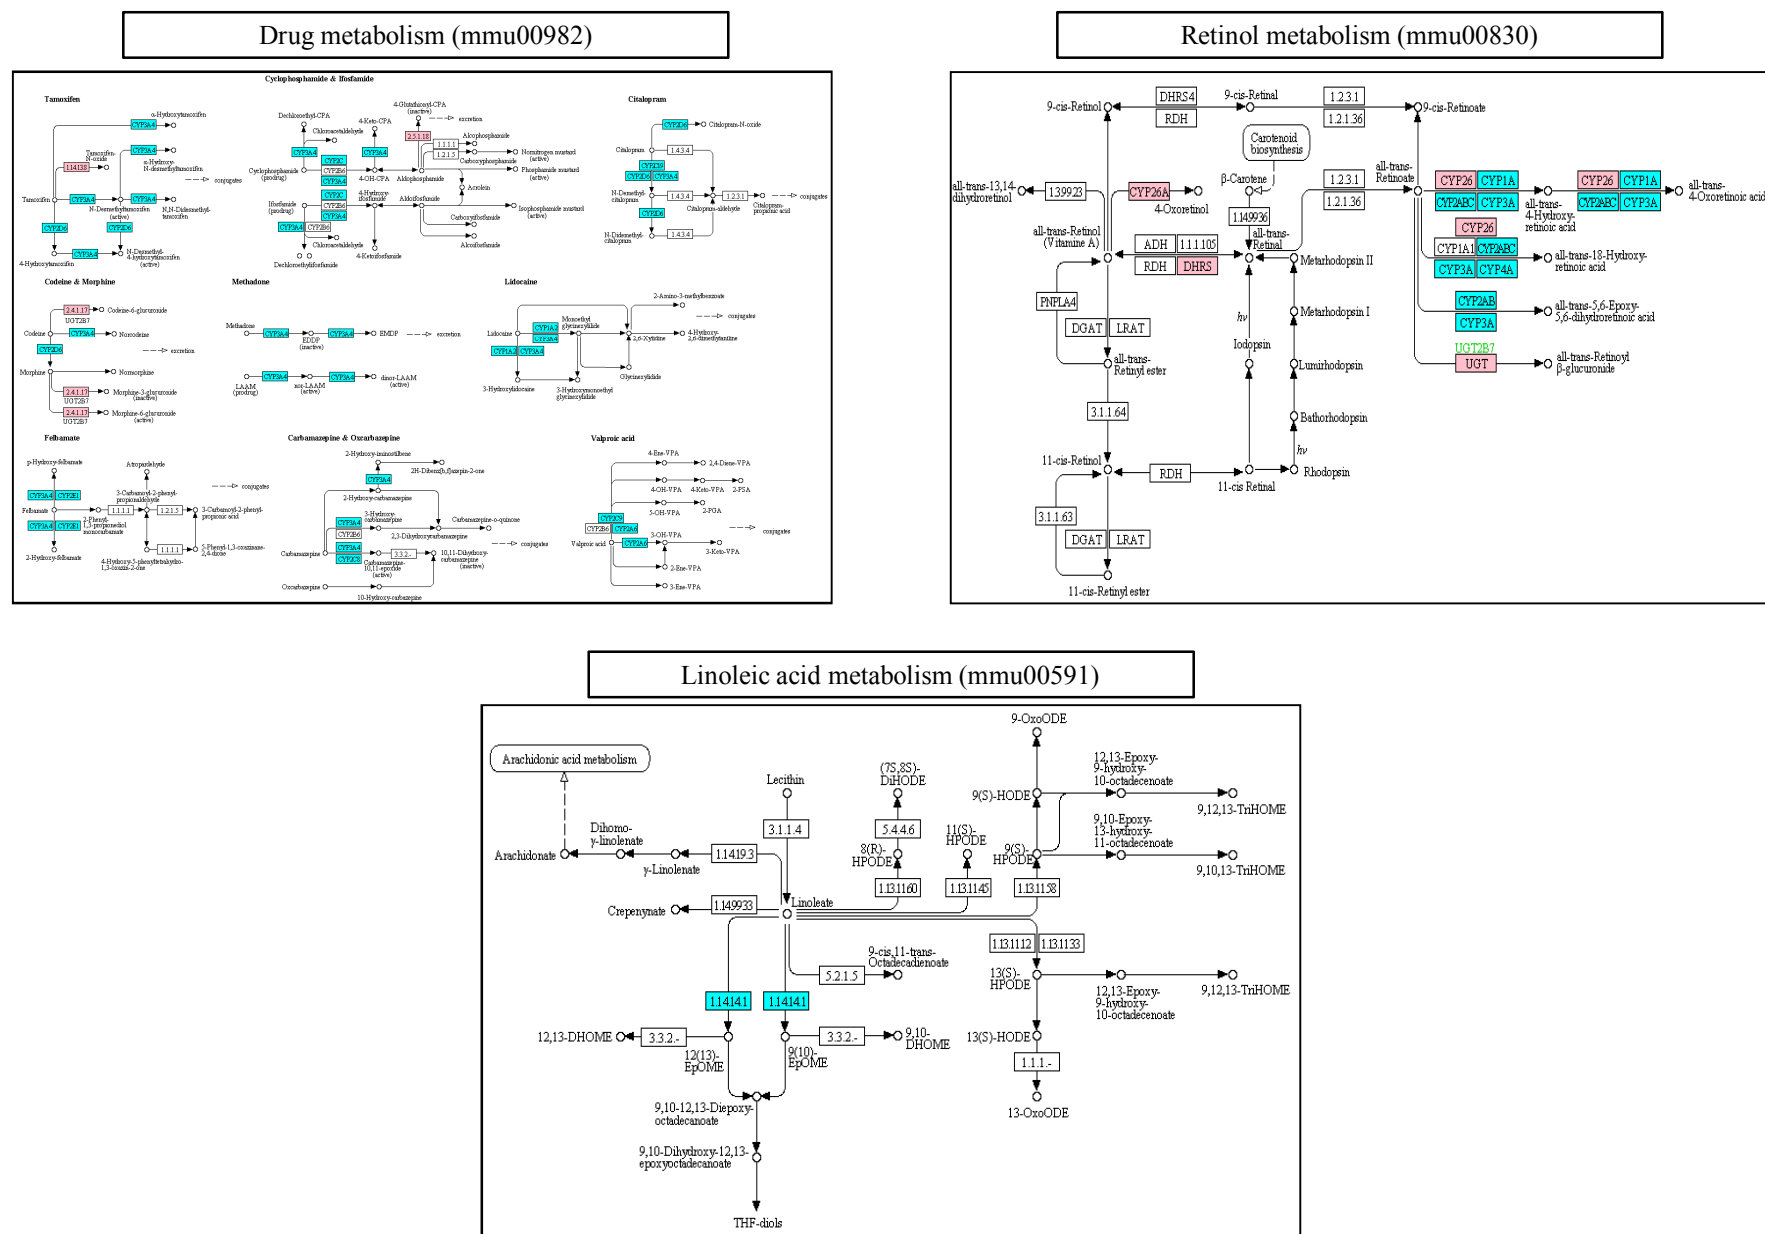

Figure S3. Continued.

# Pathways from temporal down-pattern (KEGG ID)

## Metabolism of xenobiotics by cytochrome P450 (mmu00980)

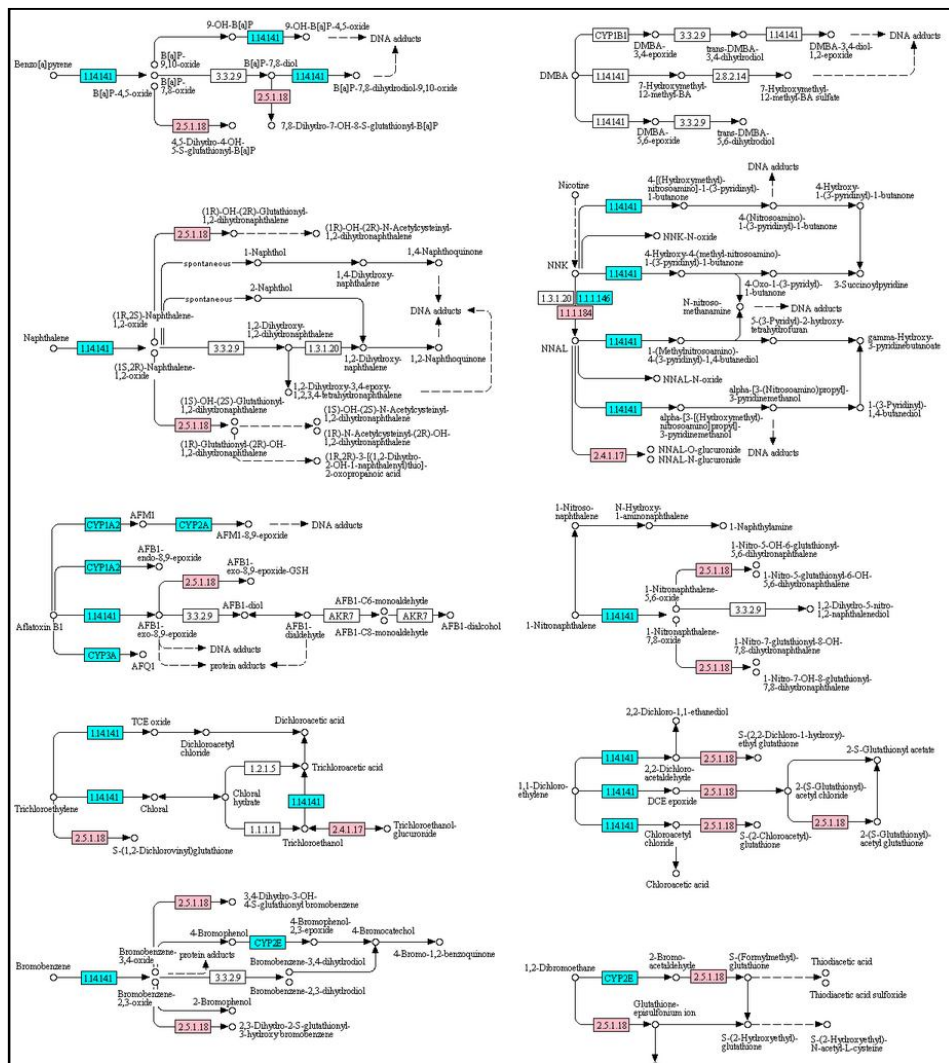

## Drug metabolism - other enzymes (mmu00983)

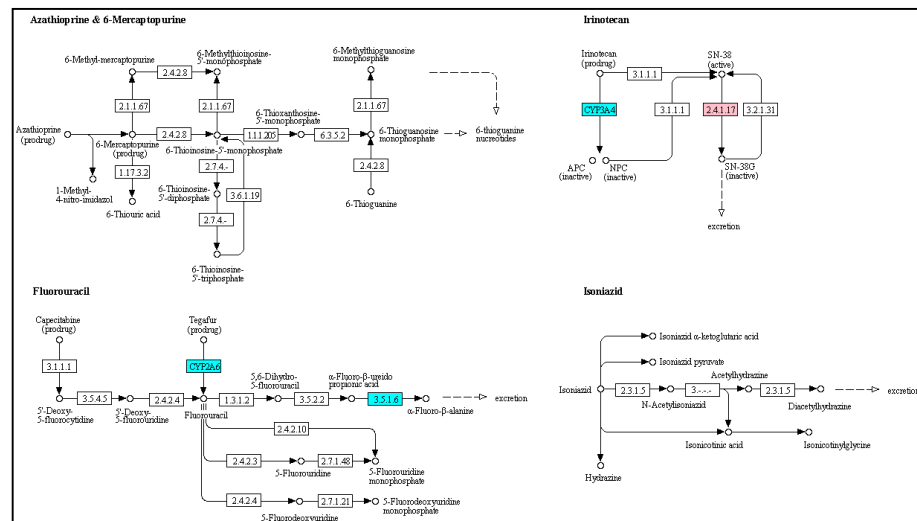

Figure S3. Continued.
